# Supplementary material for: Spatial proteomics finds CD155 and Endophilin-A1 as mediators of growth and invasion in medulloblastoma
Source: PubMed Central journal article supplement (PMC8926928; doi:10.26508/lsa.202201380), 2022-03-16
Supplement: LSA-2022-01380_review_history.pdf [file LSA-2022-01380_review_history.pdf]

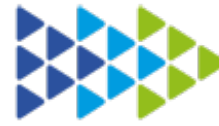

Life Science Alliance

# Spatial proteomics finds CD155 and SH3GL2 as mediators of growth and invasion in medulloblastoma

Charles Capdeville, Linda Russo, David Penton, Jessica Migliavacca, Milica Zecevic, Alexandre Gries, Stephan C.F. Neuhauss, Michael Grotzer and Martin Baumgartner

DOI: <https://doi.org/10.26508/lsa.202201380>

*Corresponding author(s): Prof. Martin Baumgartner (University Children's Hospital Zurich)*

---

## Review

## Timeline:

|                     |            |
|---------------------|------------|
| Submission Date:    | 2022-01-21 |
| Editorial Decision: | 2022-02-15 |
| Revision Received:  | 2022-02-18 |
| Accepted:           | 2022-02-24 |

---

*Scientific Editor: Eric Sawey, PhD*

## Transaction Report:

(Note: With the exception of the correction of typographical or spelling errors that could be a source of ambiguity, letters and reports are not edited. The original formatting of letters and referee reports may not be reflected in this compilation.)

No full Peer Review Process File is available with this article, as the authors have chosen not to make the review process public in this case.

Please note that the manuscript was reviewed at *Review Commons* and these reports were taken into account in the decision-making process at *Life Science Alliance*.

**Review**  
COMMONS

February 15, 2022

RE: Life Science Alliance Manuscript #LSA-2022-01380

Prof. Martin Baumgartner  
University Children's Hospital Zurich  
Oncology  
Pediatric Molecular Neuro-Oncology  
Lengghalde 5  
Zurich, ZH 8008  
Switzerland

Dear Dr. Baumgartner,

Thank you for submitting your revised manuscript entitled "Spatial proteomics finds CD155 and SH3GL2 as mediators of growth and invasion in medulloblastoma". We would be happy to publish your paper in Life Science Alliance pending final revisions necessary to meet our formatting guidelines.

Along with points mentioned below, please tend to the following:

- please upload your Tables in editable .doc or excel format
- please upload your main manuscript text as an editable doc file
- please add the Twitter handle of your host institute/organization as well as your own or/and one of the authors in our system
- please use the [10 author names, et al.] format in your references (i.e. limit the author names to the first 10)
- please add callouts for Figure S1E, G to your main manuscript text
- We noticed a legend for a graphical abstract. LSA does not currently have a section for Graphical Abstracts, so please make that Figure 6 and the title of the figure can be the first sentence of the current legend.
- please add scale bars to figure 4C

If you are planning a press release on your work, please inform us immediately to allow informing our production team and scheduling a release date.

LSA now encourages authors to provide a 30-60 second video where the study is briefly explained. We will use these videos on social media to promote the published paper and the presenting author (for examples, see <https://twitter.com/LSAJournal/timelines/1437405065917124608>). Corresponding or first-authors are welcome to submit the video. Please submit only one video per manuscript. The video can be emailed to [contact@life-science-alliance.org](mailto:contact@life-science-alliance.org)

To upload the final version of your manuscript, please log in to your account:

<https://lsa.msubmit.net/cgi-bin/main.plex>

You will be guided to complete the submission of your revised manuscript and to fill in all necessary information. Please get in touch in case you do not know or remember your login name.

To avoid unnecessary delays in the acceptance and publication of your paper, please read the following information carefully.

## A. FINAL FILES:

These items are required for acceptance.

-- An editable version of the final text (.DOC or .DOCX) is needed for copyediting (no PDFs).

-- High-resolution figure, supplementary figure and video files uploaded as individual files: See our detailed guidelines for preparing your production-ready images, <https://www.life-science-alliance.org/authors>

-- Summary blurb (enter in submission system): A short text summarizing in a single sentence the study (max. 200 characters including spaces). This text is used in conjunction with the titles of papers, hence should be informative and complementary to the title. It should describe the context and significance of the findings for a general readership; it should be written in the present tense and refer to the work in the third person. Author names should not be mentioned.

## B. MANUSCRIPT ORGANIZATION AND FORMATTING:

Full guidelines are available on our Instructions for Authors page, <https://www.life-science-alliance.org/authors>

We encourage our authors to provide original source data, particularly uncropped/-processed electrophoretic blots and spreadsheets for the main figures of the manuscript. If you would like to add source data, we would welcome one PDF/Excel-file per figure for this information. These files will be linked online as supplementary "Source Data" files.

**\*\*Submission of a paper that does not conform to Life Science Alliance guidelines will delay the acceptance of your manuscript.\*\***

**\*\*It is Life Science Alliance policy that if requested, original data images must be made available to the editors. Failure to provide original images upon request will result in unavoidable delays in publication. Please ensure that you have access to all original data images prior to final submission.\*\***

**\*\*The license to publish form must be signed before your manuscript can be sent to production. A link to the electronic license to publish form will be sent to the corresponding author only. Please take a moment to check your funder requirements.\*\***

**\*\*Reviews, decision letters, and point-by-point responses associated with peer-review at Life Science Alliance will be published online, alongside the manuscript. If you do want to opt out of having the reviewer reports and your point-by-point responses displayed, please let us know immediately.\*\***

Thank you for your attention to these final processing requirements. Please revise and format the manuscript and upload materials within 7 days.

Thank you for this interesting contribution, we look forward to publishing your paper in Life Science Alliance.

Sincerely,

Eric Sawey, PhD  
Executive Editor  
Life Science Alliance  
<http://www.lsjournal.org>

February 24, 2022

RE: Life Science Alliance Manuscript #LSA-2022-01380R

Prof. Martin Baumgartner  
University Children's Hospital Zurich  
Oncology  
Pediatric Molecular Neuro-Oncology  
Lengghalde 5  
Zurich, ZH 8008  
Switzerland

Dear Dr. Baumgartner,

Thank you for submitting your Research Article entitled "Spatial proteomics finds CD155 and SH3GL2 as mediators of growth and invasion in medulloblastoma". It is a pleasure to let you know that your manuscript is now accepted for publication in Life Science Alliance. Congratulations on this interesting work.

The final published version of your manuscript will be deposited by us to PubMed Central upon online publication.

Your manuscript will now progress through copyediting and proofing. It is journal policy that authors provide original data upon request.

Reviews, decision letters, and point-by-point responses associated with peer-review at Life Science Alliance will be published online, alongside the manuscript. If you do want to opt out of having the reviewer reports and your point-by-point responses displayed, please let us know immediately.

\*\*\*IMPORTANT: If you will be unreachable at any time, please provide us with the email address of an alternate author. Failure to respond to routine queries may lead to unavoidable delays in publication.\*\*\*

Scheduling details will be available from our production department. You will receive proofs shortly before the publication date. Only essential corrections can be made at the proof stage so if there are any minor final changes you wish to make to the manuscript, please let the journal office know now.

#### DISTRIBUTION OF MATERIALS:

Authors are required to distribute freely any materials used in experiments published in Life Science Alliance. Authors are encouraged to deposit materials used in their studies to the appropriate repositories for distribution to researchers.

You can contact the journal office with any questions, [contact@life-science-alliance.org](mailto:contact@life-science-alliance.org)

Again, congratulations on a very nice paper. I hope you found the review process to be constructive and are pleased with how the manuscript was handled editorially. We look forward to future exciting submissions from your lab.

Sincerely,

Eric Sawey, PhD

Executive Editor

Life Science Alliance

<http://www.lsjournal.org>
